# Supplementary material for: Efficacy and Safety of mFOLFOX6 as Perioperative Chemotherapy for Resectable Liver Metastases from Colorectal Cancer: as Case–Control Study
Source: Research Square preprint supplement (doi:10.21203/rs.3.rs-668510/v1), 2021-09-28

***BASE***

Study type; interventional

STUDY DESIGN

Basic design; single arm

Randomization; non-randomized

Blinding; open no one is blinded

Control; uncontrolled

***Intervention***

Purpose of intervention; treatment

Type of intervention; medicine

Intervention/control; Pre-operative chemotherapy(mFOLFOX6) 4cycles followed by surgical hepatectomy followed by post-operative chemotherapy (mFOLFOX6) 8cycles, mFOLFOX6(L-OHP85mg/m2, Levofolinate200mg/m2, 5-FU/bolus400mg/m2, 5-FU/continuous2,400mg/m2 every 2 weeks)

***Eligibility***

Age-lower limit; 20 years-old<=

Age-upper limit; 80 years-old>=

Gender; Male and Female

Key inclusion criteria;

1. Patients with histologically proven colorectal cancer
2. With measurable lesions in the liver only (no extrahepatic disease)
3. Resectable synchronous and metachronous liver metastases
4. No prior chemotherapy for colorectal cancer
5. No prior radiotherapy for colorectal cancer
6. Performance status(ECOG):0, 1
7. Life expectancy of more than 3 months
8. Sufficient organ functions
9. Written informed consent

Key exclusion criteria

1. Serious drug hypersensitivity or a history of drug allergy
2. Peripheral neuropathy
3. Active concomitant malignancy
4. Severe infectious disease
5. Serious complications (renal failure or hepatic failure)
6. High blood pressure and diabetic and hypercalcemia that cannot be controlled
7. Symptomatic or asymptomatic but treated heart disease
8. Symptomatic or asymptomatic but treated heart disease
9. Histry of mental disturbances or cerebrovascular attack
10. Fresh hemorrhage from digestive tube, intestines tube paralysis, intestinal obstruction and peptic ulcer
11. Plerral effusion, peritoneal fluid and pericardial fluid
12. Symptomatic brain metastasis
13. Water solubility diarrhea, in case of the patient who has a colostomy, diarrhea impairs daily life activity
14. Under coutinuous steroid therapy
15. History of organ transplantation
16. Traumatic gracture of unrecovery
17. Pregnant women, possibly pregnant women, wishing to become pregnant, and nursing mothers
18. Other conditions not suitable for this study


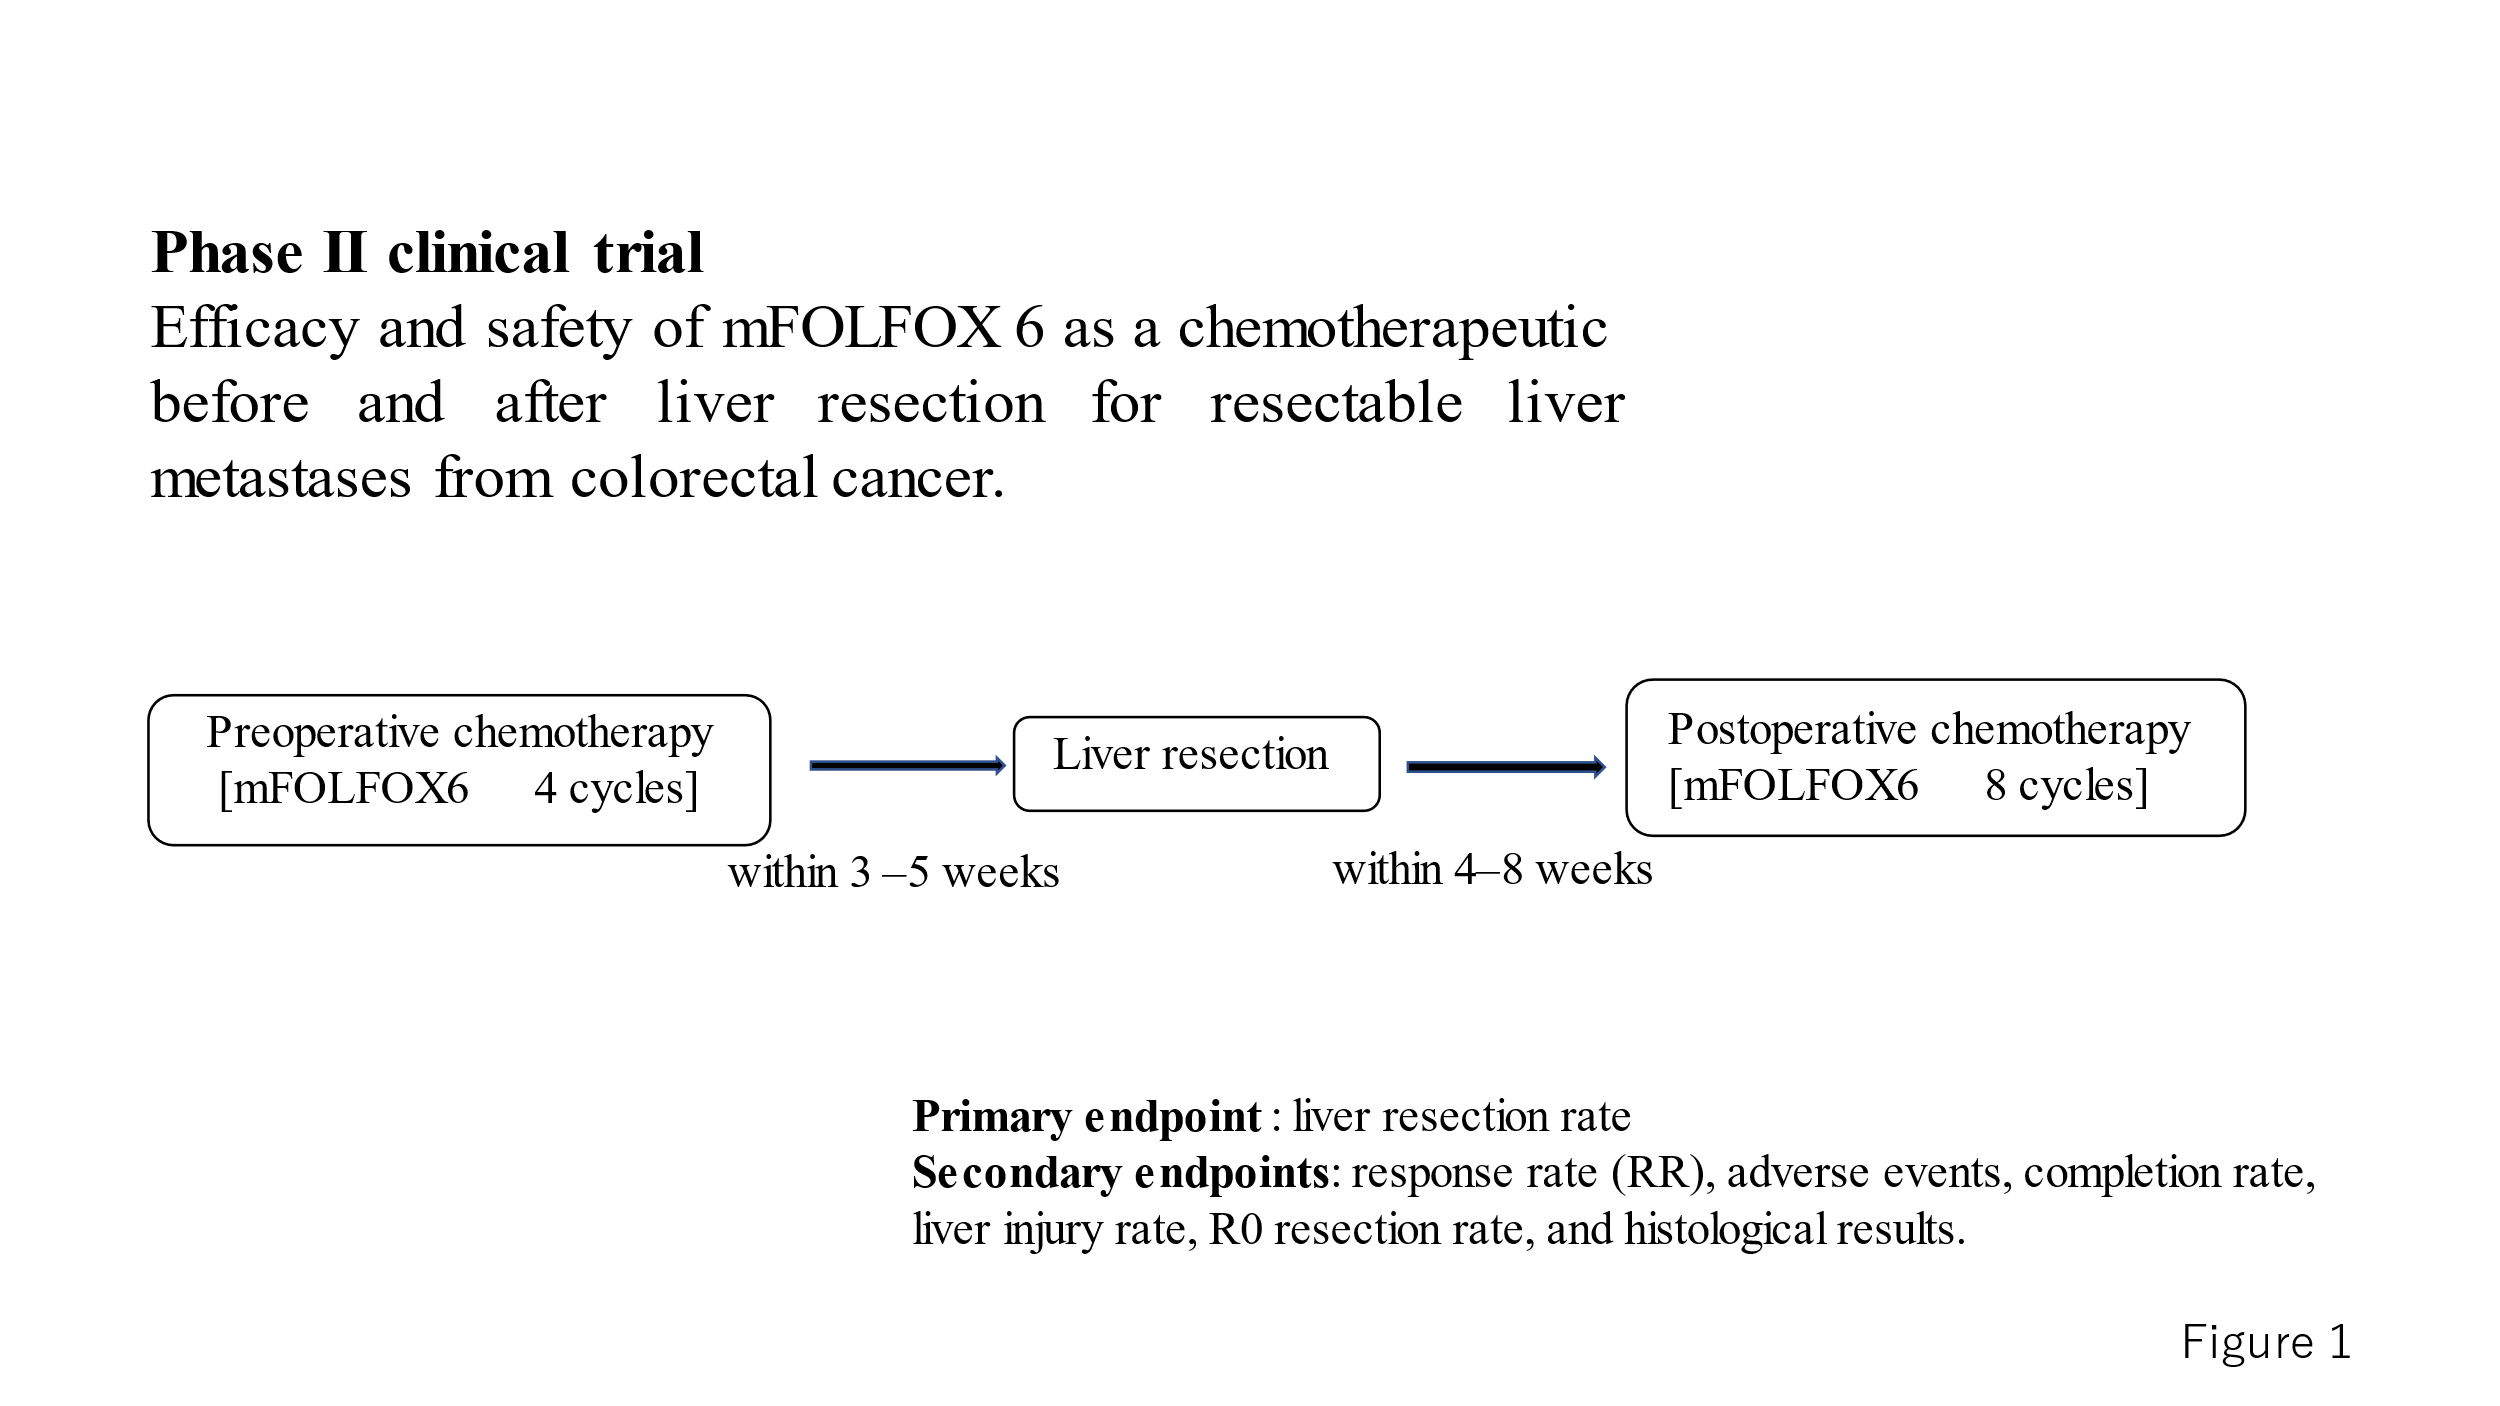


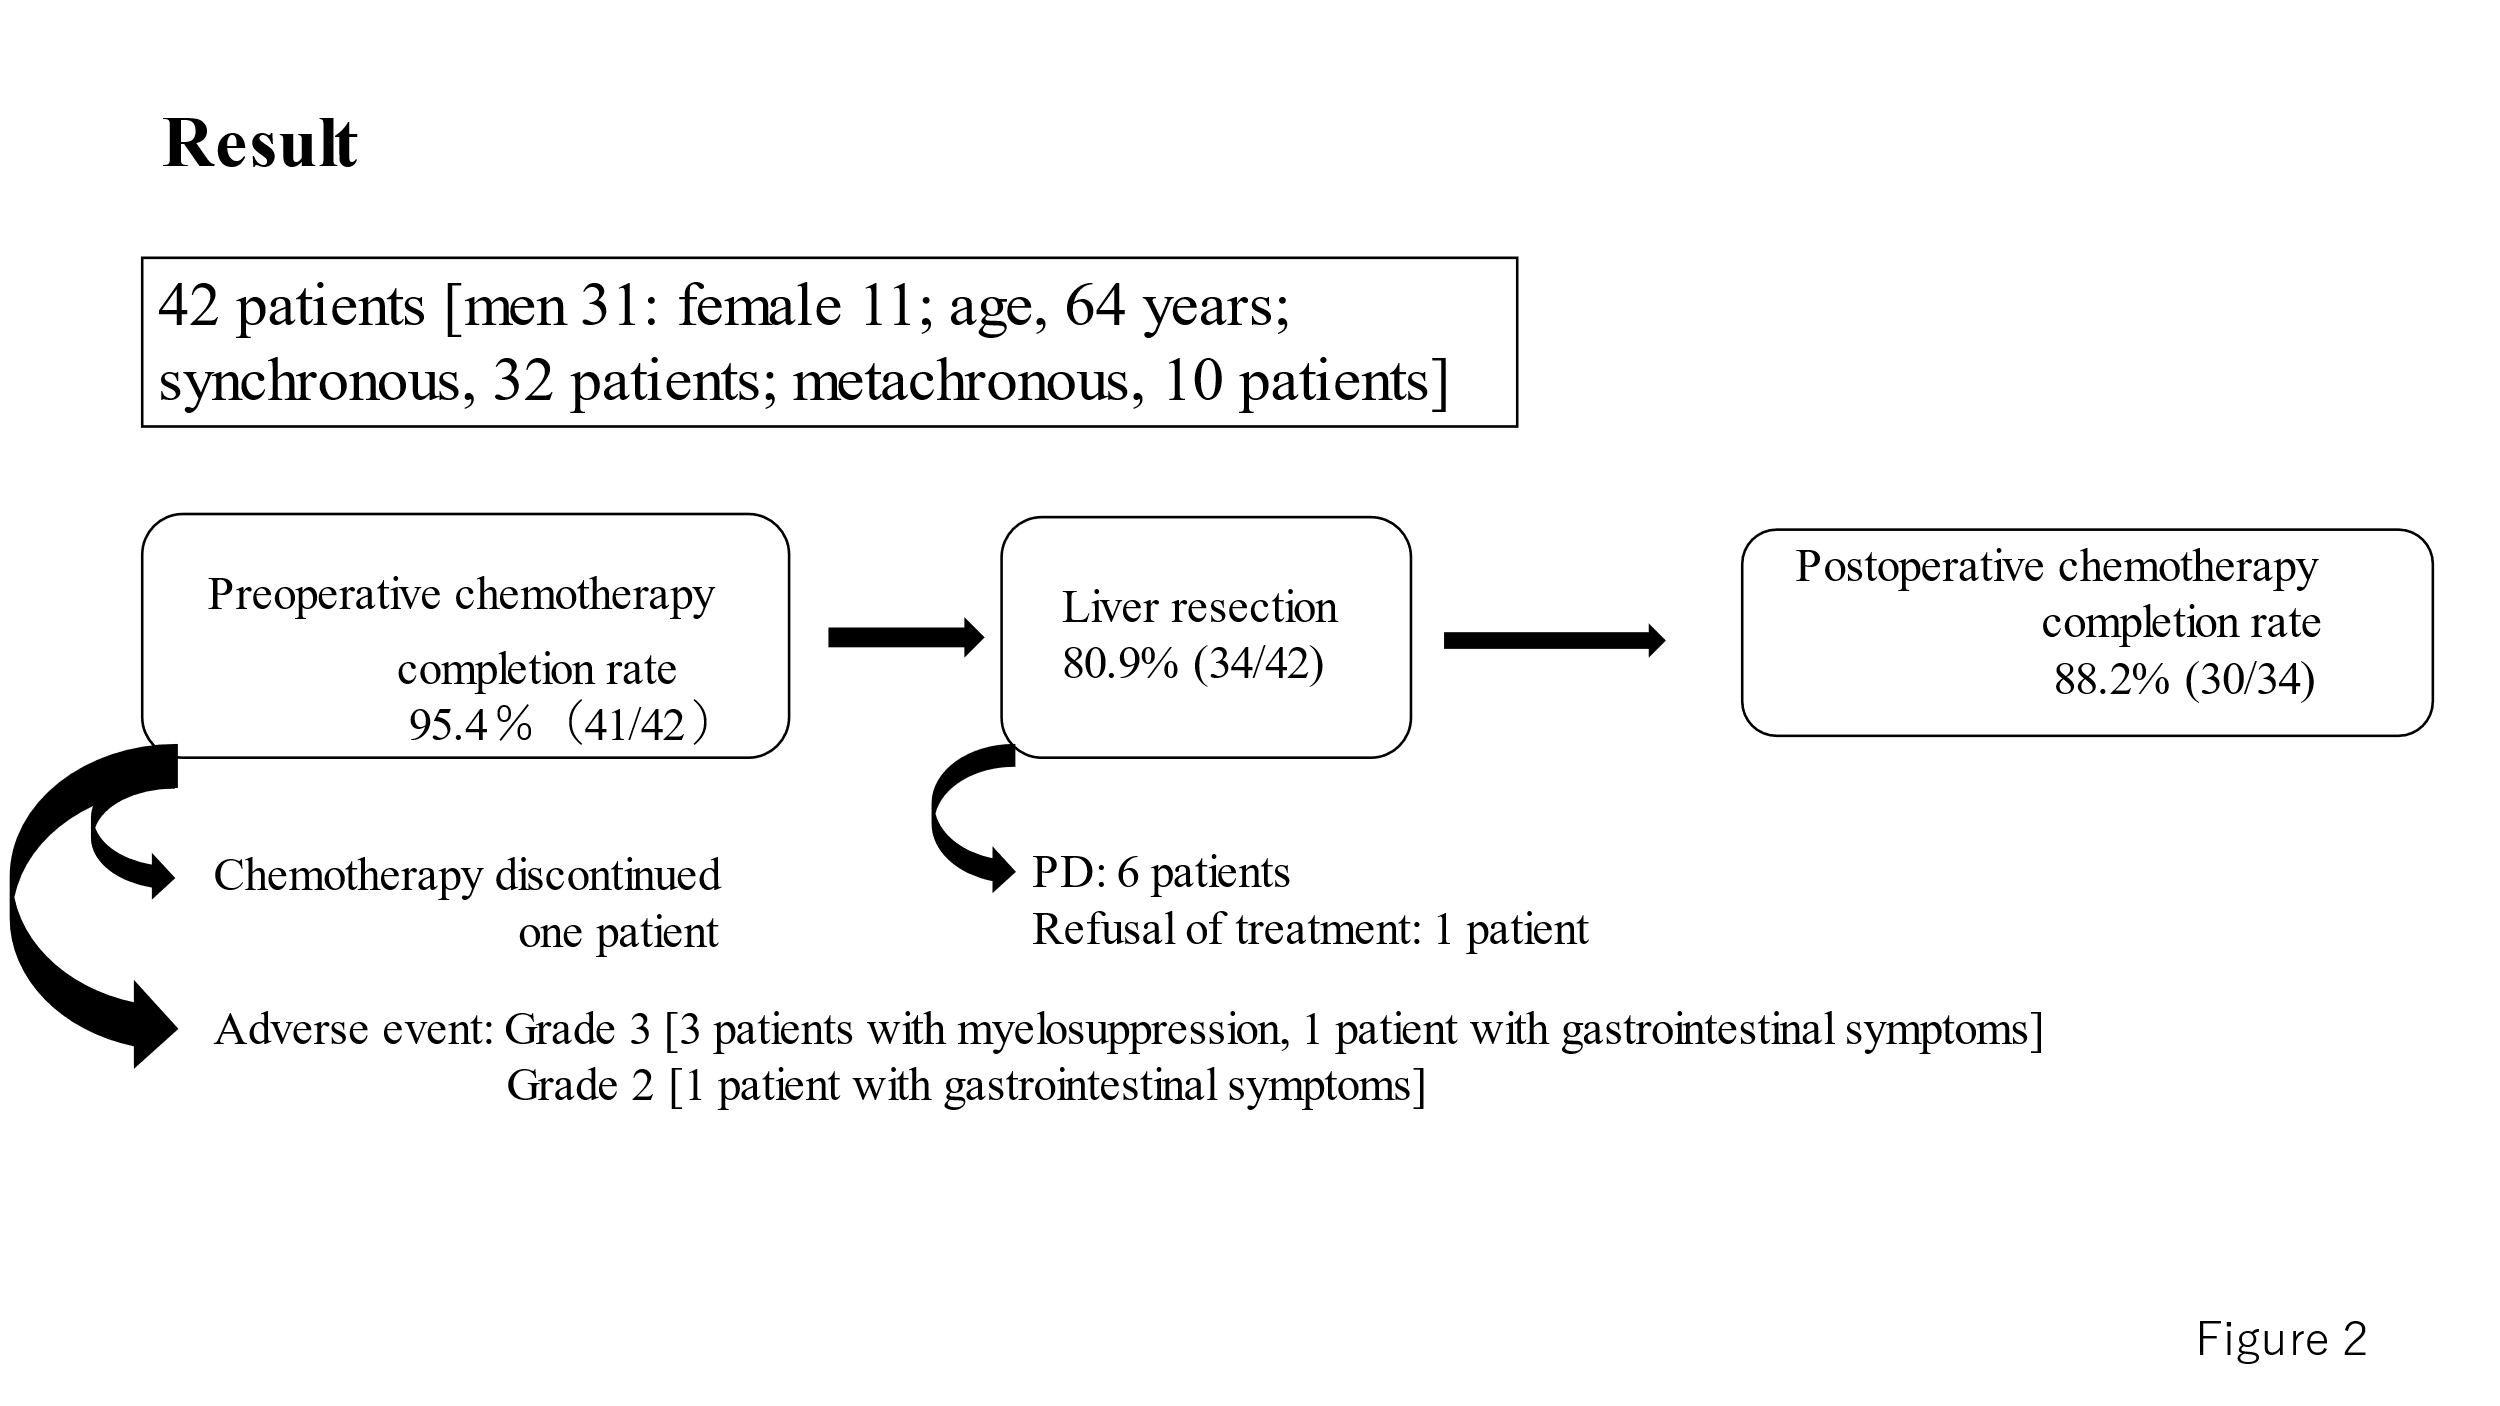

Supplement: Supplementary file 1 [file 90b37cab9fdd10ac5dfc5f60.docx]
